# Supplementary material for: A series of triphenylamine-based two-photon absorbing materials with AIE property for biological imaging
Source: Royal Society of Chemistry journal article supplement (doi:10.1039/c4tb00464g), 2014-01-01
Supplement: c4tb00464g1.pdf [file c4tb00464g1.pdf]

# Supporting Information

## A series of triphenylamine-based two-photon absorbing materials with AIE property for biological imaging

Yanqiu Liu,<sup>a</sup> Ming Kong,<sup>a</sup> Qiong Zhang,<sup>a</sup> Zhiwen Zhang,<sup>a</sup> Hongping Zhou,<sup>a</sup> Shengyi Zhang,<sup>a</sup> Shengli  
Li,<sup>a</sup> Jieying Wu,<sup>\*a</sup> Yupeng Tian<sup>\*a</sup>

<sup>a</sup>Department of Chemistry, Key Laboratory of Functional Inorganic Materials Chemistry of Anhui Province, Anhui  
University, Hefei 230039, P. R.China;

(phone: +86-551-65108151; fax:+86-551-63861279; e-mail: [jywu1957@163.com](mailto:jywu1957@163.com); [yptian@ahu.edu.cn](mailto:yptian@ahu.edu.cn);) )

### Table of Contents

|                                                                                                                                                                                                                                                                                                             |    |
|-------------------------------------------------------------------------------------------------------------------------------------------------------------------------------------------------------------------------------------------------------------------------------------------------------------|----|
| Figure S1. (a) ORTEP diagram of <b>1A</b> , Hydrogen atoms are omitted for clarity (b) the side elevation of <b>1A</b> . (c) One-dimensional chain of <b>1A</b> showing the N–O···H (green) along the a-axis.....                                                                                           | 3  |
| Figure S2. One-dimensional chain of <b>2A</b> showing the C–H···O (green) along the <i>a</i> -axis.....                                                                                                                                                                                                     | 4  |
| Figure S3. One-dimensional chain of <b>3A</b> showing the C–H···N (violet) along the b-axis.....                                                                                                                                                                                                            | 4  |
| Figure S4. Linear absorption spectra of dyes <b>1A-3A</b> and <b>1B-3B</b> in five organic solvents of different polarities.....                                                                                                                                                                            | 6  |
| Figure S5. Molecular orbital energy diagram of <b>1A-3A</b> .....                                                                                                                                                                                                                                           | 6  |
| Figure S6. One-photon fluorescence spectra of dyes <b>1A-3A</b> and <b>1B-3B</b> in five organic solvents of different polarities.....                                                                                                                                                                      | 7  |
| Figure S7. (left) The TPEF spectra of chromophores <b>2B</b> and <b>3B</b> in ethyl acetate pumped by femtosecond laser at 300 mw under different excitation wavelengths. (right) The logarithmic plots of the fluorescence integral of chromophores versus different excitation intensities at 700 nm..... | 8  |
| Figure S8. Cytotoxicity data results obtained from the MTT assay ( <i>c</i> =1×10 <sup>-4</sup> M).....                                                                                                                                                                                                     | 9  |
| Table S1. Photophysical properties of dyes <b>1A- 3A</b> in five different solvents.....                                                                                                                                                                                                                    | 10 |
| Table S2. Table S2. Selected bond lengths [Å] and angles [°] for <b>1A</b> , <b>2A</b> , <b>3A</b> and <b>3B</b> .....                                                                                                                                                                                      | 10 |
| Table S3. Photophysical properties of dyes <b>1A- 3A</b> and <b>1B-3B</b> in five different solvents.....                                                                                                                                                                                                   | 11 |

Synthesis of compound **M1-M3**

**Preparation of 4-Nitro-benzyl-triphenylphosphonium bromide (M1)**

4-Nitro-benzyl-triphenylphosphonium bromide was prepared referring the literature.<sup>1</sup>

**Preparation of 4-Diphenylaminobenzaldehyde (M2)**

4-Diphenylaminobenzaldehyde was prepared referring the literature.<sup>2</sup>

**Preparation of 4-[N, N'-bis(4-ethoxyphenyl)amino]benzaldehyde (M3)**

**4-Iodophenetole** 233.50 g (1.06 mol) 4-Iodo-phenol and 42.45 g (1.06 mol) NaOH was placed into a dry mortar and well milled into powder, and then the mixture was transferred to 1000 mL round-bottom flask equipped with a magnetic stirrer. 300 mL of bromoethane, 15 mL of N, N-dimethylformamide and a catalytic amount of CsOH were added to the flask. The reactants were stirred at room temperature for 1 h, and then the mixture was heated up gradually to 80 °C and refluxed for about 70 h. Thin layer chromatography (TLC) confirmed the absence of the starting material for the reactions. The solvent bromoethane was evaporated under reduced pressure after the solution was cooled to room temperature, and firstly appropriate amount of dichloromethane was added with stirring, secondly appropriate amount of water was added, separated and the organic layer solution was obtained, dried by anhydrous MgSO<sub>4</sub>, filtered and concentrated. 252.43 g red oil was obtained. Yield: 96.2%. <sup>1</sup>H-NMR: (400 Hz, (CD<sub>3</sub>)<sub>2</sub>SO),  $\delta$  (ppm): 7.57 (d,  $J = 8.8$  Hz, 2H), 6.76 (d,  $J = 8.8$  Hz, 2H), 3.98 (q,  $J = 6.9$  Hz, 2H), 1.30 (t,  $J = 7.0$  Hz, 3H). IR (KBr, cm<sup>-1</sup>): 2979, 2929, 1586, 1486, 1392, 1244, 1047, 820, 630, 507. HRMS (GCT-MS) Calcd for C<sub>8</sub>H<sub>9</sub>IO, 247.97; Found, 247.9692.

**N, N'-bis(4-ethoxyphenyl)phenylamine** A suspension of 2.32 g (25 mmol) of Phenylamine, 20.86 g (75 mmol) of 4-Iodophenetole and 200 mL 1, 2-dichlorobenzene were added into a three-necked flask equipped with a magnetic stirrer, a reflux condenser, and a nitrogen input tube, and then 17.94 g (130 mmol) of anhydrous K<sub>2</sub>CO<sub>3</sub> and 8.34 g (130 mmol) copper powder were added slowly. At last, a catalytic amount of 18-crown-6 was added under stirred. The reaction mixture was refluxed for 12 h in a heating mantle under nitrogen and monitored by TLC. After completion of the reaction, the solvent 1, 2-dichlorobenzene was evaporated under reduced pressure after the solution was cooled to room temperature. The crude product was purified by column chromatography with petroleum

(b.p. 60-90 °C)/ethyl acetate (20:1 by volume) to yield 2.2 g of pale yellow oil. Yield: 26.4%.  $^1\text{H-NMR}$ : (400 Hz,  $(\text{CD}_3)_2\text{CO}$ ),  $\delta$  (ppm): 7.18 (t,  $J = 7.6$  Hz, 2H), 7.02 (d,  $J = 8.4$  Hz, 4H), 6.86 (q,  $J = 8.1$  Hz, 7H), 4.04 (q,  $J = 6.9$  Hz, 4H), 1.37 (t,  $J = 7.0$  Hz, 6H). IR (KBr,  $\text{cm}^{-1}$ ): 3034, 2977, 2932, 2893, 2855, 1597, 1507, 1324, 1245, 1162, 827, 753, 695.

#### 4-[N, N'-bis(4-ethoxyphenyl)amino]benzaldehyde (M3)

4-[N, N'-bis(4-ethoxyphenyl)amino]benzaldehyde was prepared referring the literature.<sup>29</sup> Yellow oil was obtained. Yield: 40.7%.  $^1\text{H-NMR}$ : ((400 Hz,  $(\text{CD}_3)_2\text{CO}$ ),  $\delta$  (ppm): 9.76(s, 1H), 7.67 (d,  $J = 8.4$  Hz, 2H), 7.19 (d,  $J = 8.8$  Hz, 4H), 6.98 (d,  $J = 8.4$  Hz, 4H), 6.78 (d,  $J = 8.8$  Hz, 2H), 4.07 (q,  $J = 6.9$  Hz, 4H), 1.38 (t,  $J = 7.0$  Hz, 6H). IR (KBr,  $\text{cm}^{-1}$ ): 3039, 2974, 2927, 2870, 1690, 1592, 1561, 1505, 1471, 1240, 1161, 826, 717, 684. HRMS (GCT-MS) Calcd for  $\text{C}_{23}\text{H}_{23}\text{NO}_3$ , 361.17; Found, 361.1653.

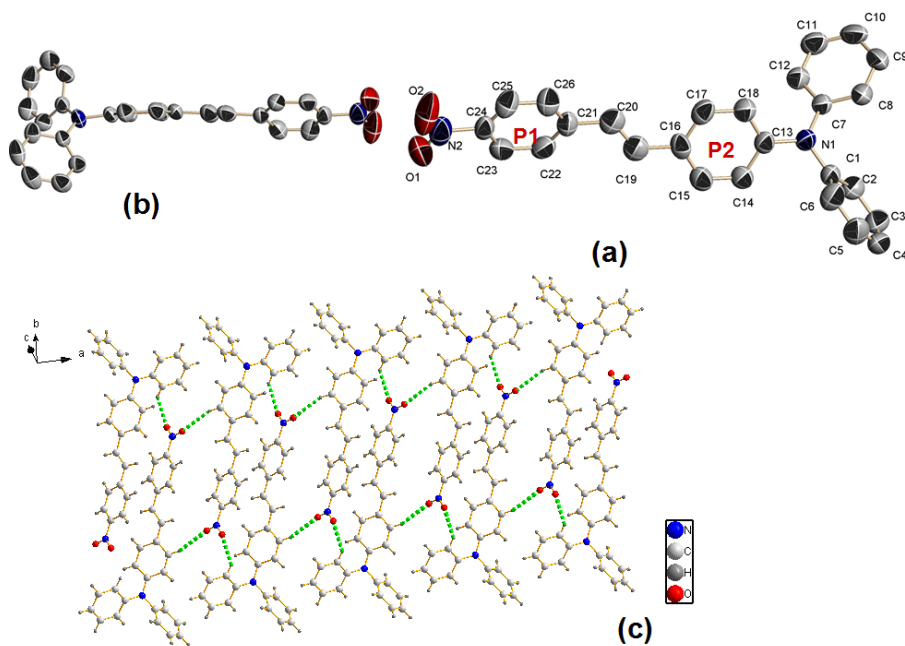

**Fig. S1.** (a) ORTEP diagram of **1A**, Hydrogen atoms are omitted for clarity. (b) the side elevation of **1A**. (c) One-dimensional chain of **1A** showing the N-O $\cdots$ H (green) along the *a*-axis.

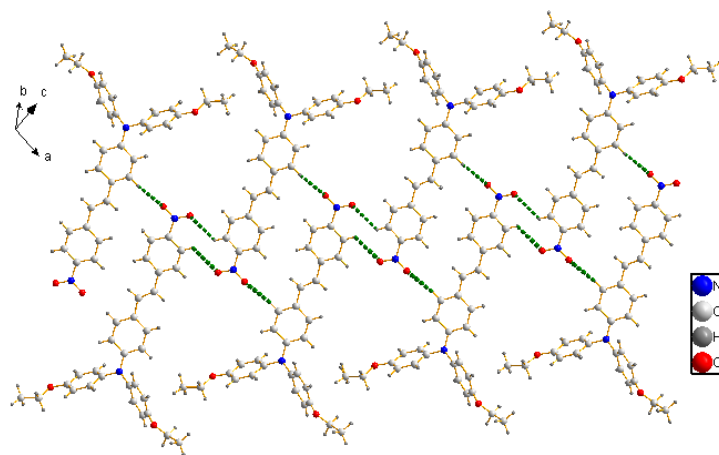

**Fig. S2.** One-dimensional chain of **2A** showing the C-H...O (green) along the *a*-axis

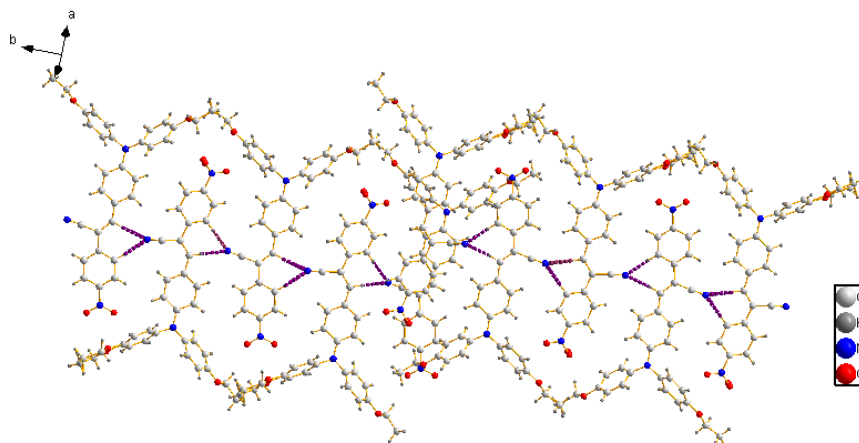

**Fig. S3.** One-dimensional chain of **3A** showing the C-H...N (violet) along the *b*-axis.

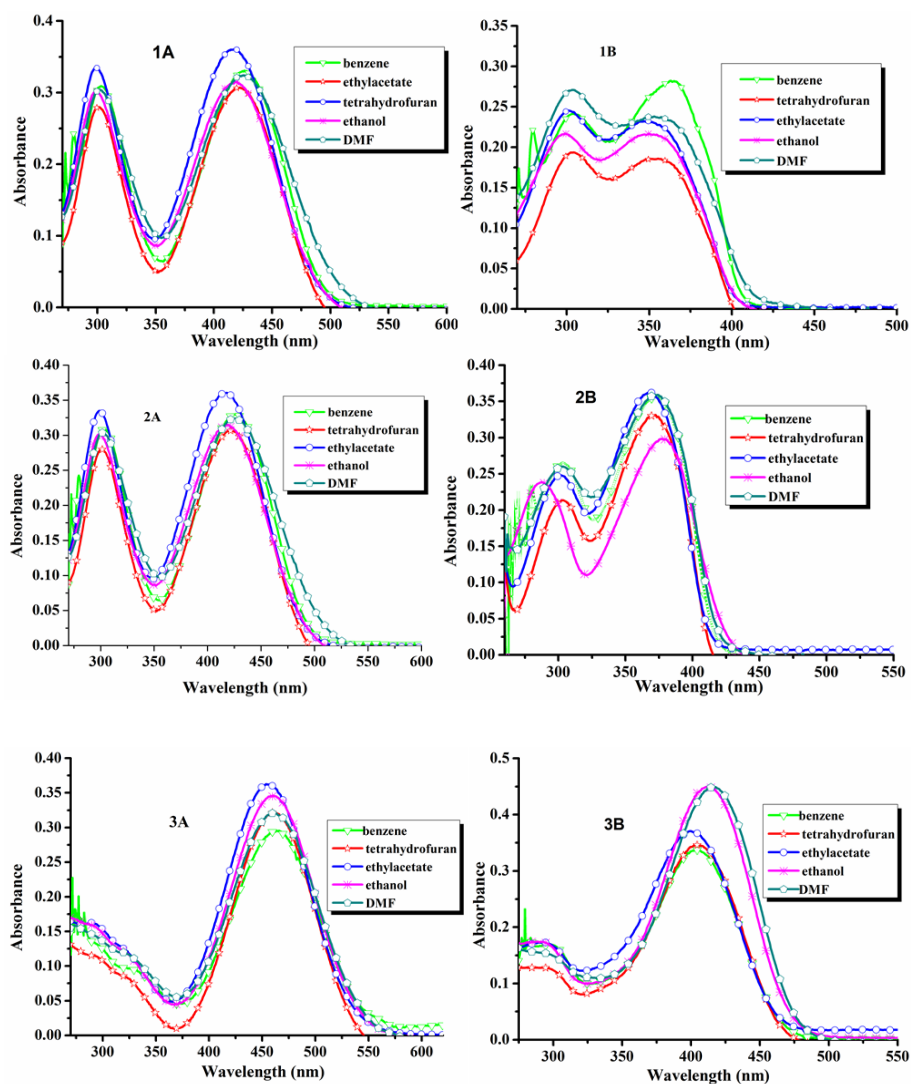

Fig.S4. Linear absorption spectra of chromophores 1A-3A and 1B-3B in five organic solvents of different polarities

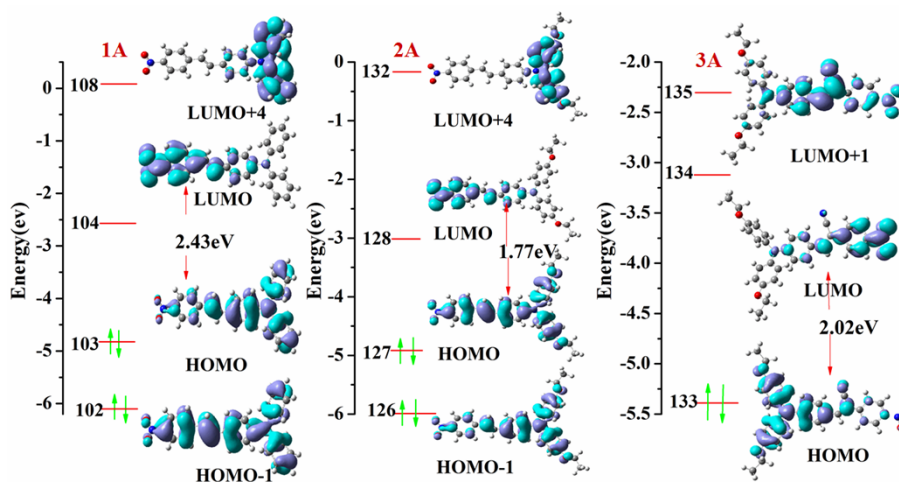

Fig. S5. Molecular orbital energy diagram of 1A-3A

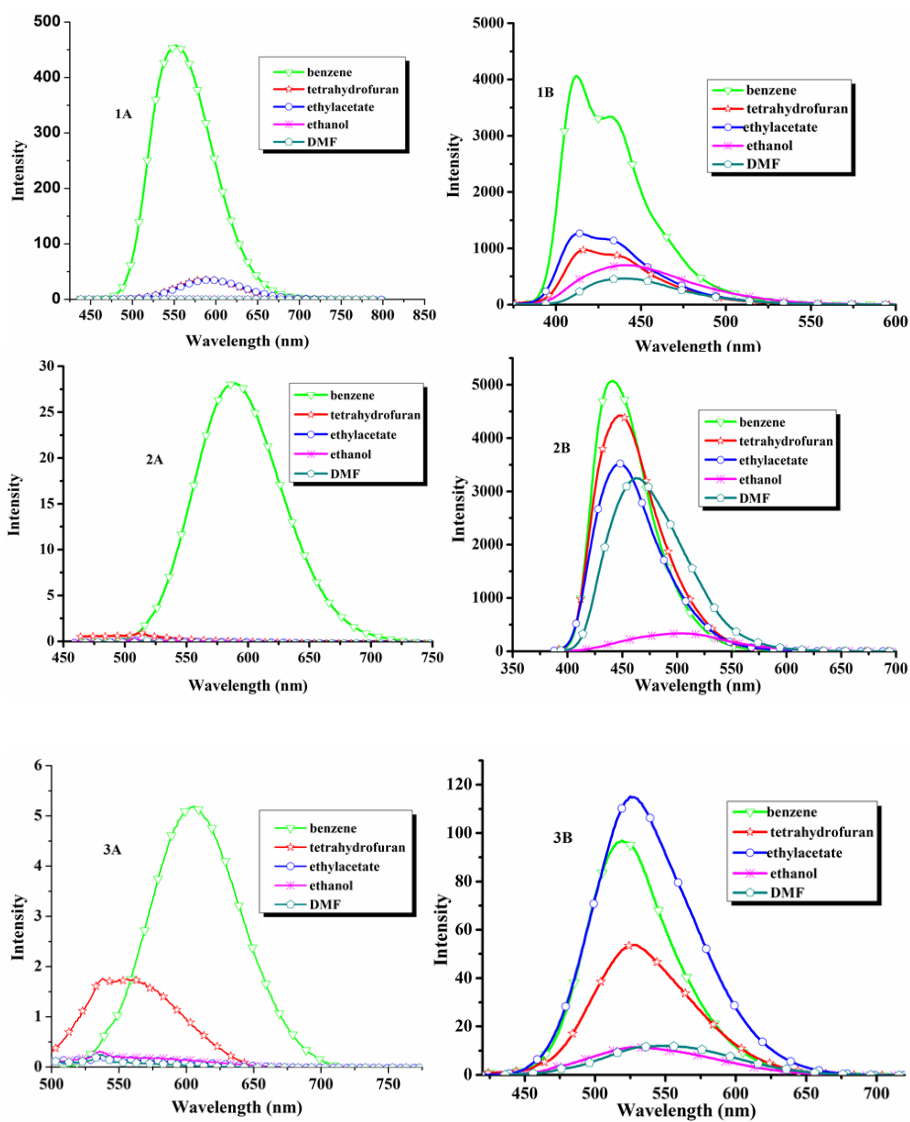

**Fig. S6.** One-photon fluorescence spectra of chromophores **1A-3A** and **1B-3B** in five organic solvents of different polarities

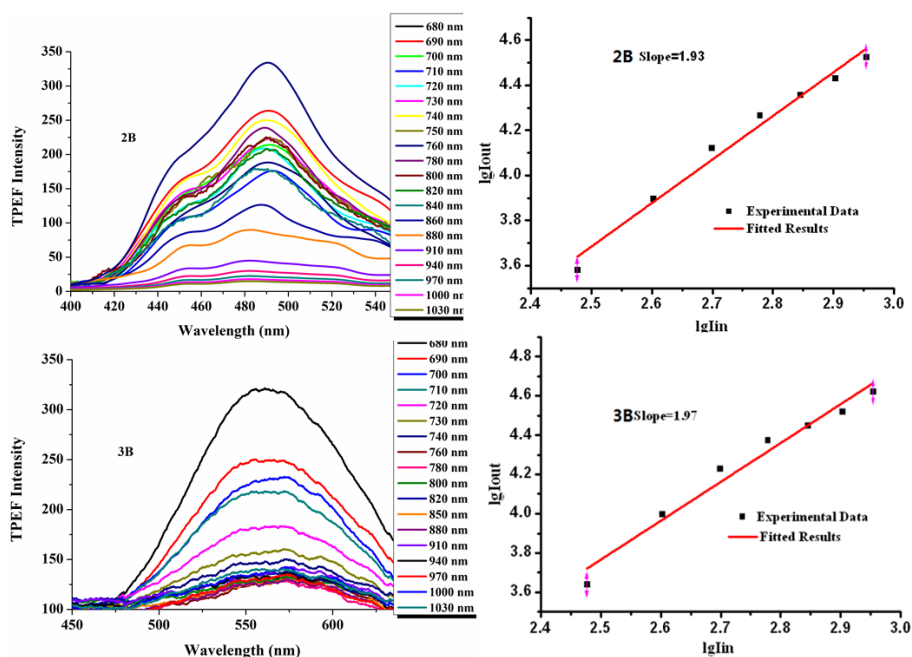

**Fig. S7.** (left) The TPEF spectra of chromophores **2B** and **3B** in ethyl acetate pumped by femtosecond laser at 300 mw under different excitation wavelengths. (right) The logarithmic plots of the fluorescence integral of chromophores versus different excitation intensities at 700 nm

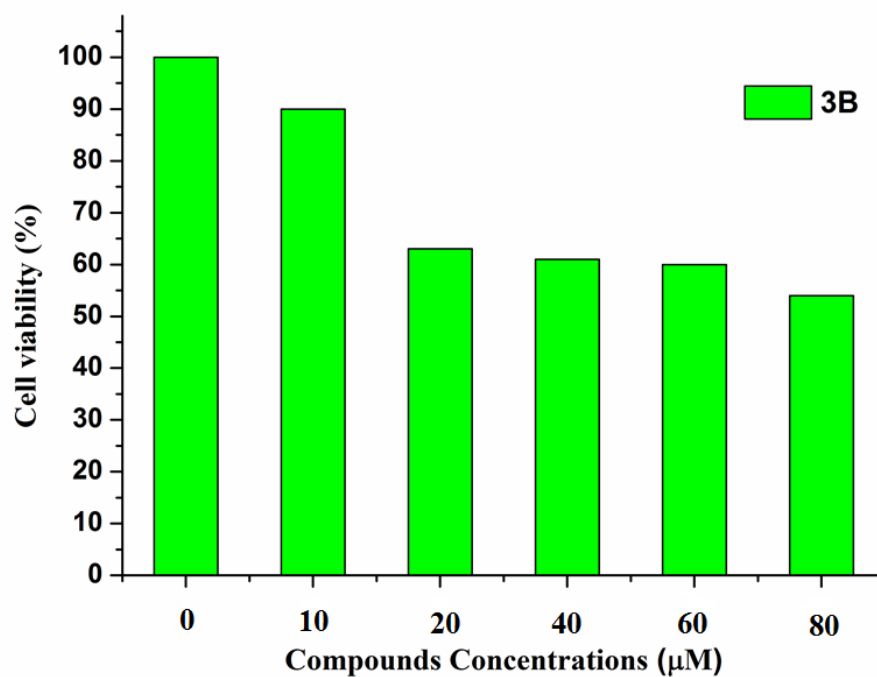

**Fig. S8.** Cytotoxicity data results obtained from the MTT assay ( $c = 1 \times 10^{-4}$  M)

**Table S1** Crystal data collection and structure refinement of **1A-3A** and **3B**

| Compd                                                                       | <b>1A</b>                                                     | <b>2A</b>                                                     | <b>3A</b>                                                     | <b>3B</b>                                                     |
|-----------------------------------------------------------------------------|---------------------------------------------------------------|---------------------------------------------------------------|---------------------------------------------------------------|---------------------------------------------------------------|
| Chemical Formula                                                            | C <sub>26</sub> H <sub>20</sub> N <sub>2</sub> O <sub>2</sub> | C <sub>30</sub> H <sub>28</sub> N <sub>2</sub> O <sub>4</sub> | C <sub>62</sub> H <sub>54</sub> N <sub>6</sub> O <sub>8</sub> | C <sub>31</sub> H <sub>29</sub> N <sub>3</sub> O <sub>2</sub> |
| Formula weight                                                              | 392.44                                                        | 480.54                                                        | 1011.11                                                       | 475.57                                                        |
| Crystal system                                                              | Monoclinic                                                    | Monoclinic                                                    | Triclinic                                                     | Monoclinic                                                    |
| Space group                                                                 | <i>P</i> 2 <sub>1</sub> / <i>c</i>                            | <i>P</i> 2 <sub>1</sub>                                       | $\bar{P}i$                                                    | <i>P</i> 2 <sub>1</sub>                                       |
| <i>a</i> (Å)                                                                | 8.488(5)                                                      | 10.326(5)                                                     | 11.899(5)                                                     | 10.717(5)                                                     |
| <i>b</i> (Å)                                                                | 8.983(5)                                                      | 22.629(5)                                                     | 12.656(5)                                                     | 13.917(5)                                                     |
| <i>c</i> (Å)                                                                | 27.088(5)                                                     | 12.174(5)                                                     | 18.797(5)                                                     | 17.565(5)                                                     |
| $\alpha$ (o)                                                                | 90.000                                                        | 90.000                                                        | 85.623(5)                                                     | 90.000                                                        |
| $\beta$ (o)                                                                 | 96.500(5)                                                     | 114.636(5)                                                    | 74.828(5)                                                     | 92.417(5)                                                     |
| $\gamma$ (o)                                                                | 90.000                                                        | 90.000                                                        | 87.564(5)                                                     | 90.000                                                        |
| <i>V</i> (Å <sup>3</sup> )                                                  | 2052.1(2)                                                     | 2585.7(2)                                                     | 2723.3(2)                                                     | 2617.5(2)                                                     |
| <i>Z</i>                                                                    | 4                                                             | 4                                                             | 2                                                             | 4                                                             |
| <i>R</i> <sub>1</sub> , <i>wR</i> <sub>2</sub> [ <i>I</i> ≥ 2σ( <i>I</i> )] | 0.0574, 0.1511                                                | 0.0688, 0.1895                                                | 0.0764, 0.2228                                                | 0.0506, 0.1390                                                |
| <i>R</i> <sub>1</sub> , <i>wR</i> <sub>2</sub> [ <i>all data</i> ]          | 0.0973, 0.1833                                                | 0.1583, 0.2322                                                | 0.1274, 0.2640                                                | 0.1023, 0.1797                                                |
| Goodness-of-fit on F <sup>2</sup>                                           | 1.026                                                         | 0.994                                                         | 1.044                                                         | 1.005                                                         |

**Table S2.** Selected bond lengths [Å] and angles [°] for **1A-3A** and **3B**

| <b>1A</b>        |          |                   |          |                  |          |
|------------------|----------|-------------------|----------|------------------|----------|
| C(21)-C(20)      | 1.491(4) | C(19)-C(16)       | 1.484(4) | C(19)-C(20)      | 1.266(4) |
| C(7)-N(1)-C(1)   | 119.2(2) | C(13)-N(1)-C(7)   | 120.8(2) | C(1)-N(1)-C(13)  | 119.6(2) |
| <b>2A</b>        |          |                   |          |                  |          |
| C(22)-C(23)      | 1.498(6) | C(21)-C(20)       | 1.465(5) | C(22)-C(21)      | 1.280(5) |
| N(1)-O(3)        | 1.216(5) | N(1)-O(4)         | 1.211(6) | C(3)-O(1)        | 1.456(2) |
| C(15)-N(2)-C(9)  | 119.5(3) | C(15)-N(2)-C(6)   | 120.6(3) | C(9)-N(2)-C(6)   | 117.2(3) |
| O(4)-N(1)-O(3)   | 123.2(5) | C(22)-C(21)-C(20) | 127.4(4) | O(3)-N(1)-C(28)  | 119.2(6) |
| <b>3A</b>        |          |                   |          |                  |          |
| C(10)-C(9)       | 1.452(5) | C(9)-C(7)         | 1.354(5) | C(7)-C(4)        | 1.487(4) |
| C(7)-C(8)        | 1.443(5) | C(8)-N(3)         | 1.136(4) | C(19)-O(3)       | 1.366(5) |
| C(16)-N(2)-C(13) | 123.1(3) | C(24)-N(2)-C(13)  | 120.0(3) | C(16)-N(2)-C(24) | 116.9(3) |
| C(7)-C(8)-N(3)   | 176.5(4) | C(10)-C(9)-C(7)   | 133.5(3) | O(1)-N(1)-O(2)   | 107.9(2) |
| <b>3B</b>        |          |                   |          |                  |          |
| C(26)-C(24)      | 1.481(3) | C(24)-C(23)       | 1.348(3) | C(23)-C(20)      | 1.457(3) |
| C(24)-C(25)      | 1.436(4) | C(25)-N(1)        | 1.154(3) | N(2)-H(2A)       | 0.860(2) |
| C(24)-C(25)-N(1) | 177.5(3) | C(26)-C(24)-C(23) | 126.2(2) | C(4)-N(3)-C(17)  | 120.9(2) |
| C(8)-N(3)-C(17)  | 120.7(2) | C(8)-N(3)-C(4)    | 118.3(2) | H(2A)-N(2)-C(29) | 120.0    |



**Table S3.** Photophysical properties of dyes **1A- 3A** and **1B-3B** in five different solvents

| Compd     | Solvents      | $\lambda_{max}^a(\epsilon_{max}^b)$ | $\lambda_{max}^c$ | $\Phi$ | $\tau/ns$ | $\Delta\nu(cm^{-1})$ | $\lambda_{max}^d$ | $\sigma/GM$ | $\sigma \times \Phi$ |
|-----------|---------------|-------------------------------------|-------------------|--------|-----------|----------------------|-------------------|-------------|----------------------|
| <b>1B</b> | benzene       | 302(2.4), 363(2.8)                  | 529               | 0.140  | 1.02      | 3125                 |                   |             |                      |
|           | THF           | 302(1.9), 352(3.2)                  | 548               | 0.051  | 0.47      | 4246                 |                   |             |                      |
|           | ethyl acetate | 301(2.5), 347(2.3)                  | 414               | 0.050  | 0.51      | 4664                 |                   |             |                      |
|           | ethanol       | 299(2.2), 350(2.2)                  | 439               | 0.037  | 0.38      | 5792                 |                   |             |                      |
|           | DMF           | 303(2.7), 353(2.4)                  | 440               | 0.022  | 0.35      | 5601                 |                   |             |                      |
| <b>2B</b> | benzene       | 303(2.7), 372(3.3)                  | 441               | 0.160  | 1.61      | 4206                 |                   |             |                      |
|           | THF           | 303(2.1), 372(3.3)                  | 447               | 0.150  | 0.73      | 4510                 |                   |             |                      |
|           | ethyl acetate | 301(2.5), 368(3.6)                  | 448               | 0.104  | 0.73      | 4852                 | 500               | 3160        | 527                  |
|           | ethanol       | 287(2.4), 377(3.0)                  | 508               | 0.018  | 0.49      | 6840                 |                   |             |                      |
|           | DMF           | 303(2.6), 374(3.6)                  | 463               | 0.123  | 1.73      | 5140                 |                   |             |                      |
| <b>3B</b> | benzene       | 405(3.4)                            | 519               | 0.0039 | 0.45      | 5424                 |                   |             |                      |
|           | THF           | 404(3.5)                            | 525               | 0.0021 | 1.31      | 5705                 |                   |             |                      |
|           | ethyl acetate | 399(3.7)                            | 527               | 0.0042 | 0.97      | 6087                 | 550               | 98369       | 394                  |
|           | ethanol       | 413(4.5)                            | 528               | 0.0004 | 0.04      | 5274                 |                   |             |                      |
|           | DMF           | 416(4.5)                            | 546               | 0.0004 | 0.05      | 5723                 |                   |             |                      |
| <b>1A</b> | benzene       | 303(3.1), 426(3.3)                  | 550               |        |           |                      |                   |             |                      |
|           | THF           | 301(2.8), 418(3.6)                  | 587               |        |           |                      |                   |             |                      |
|           | ethyl         | 299(3.0), 418(3.6)                  | 591               |        |           |                      |                   |             |                      |
|           | ethanol       | 299(3.0), 418(3.2)                  |                   |        |           |                      |                   |             |                      |
|           | DMF           | 302(3.0), 352(3.2)                  |                   |        |           |                      |                   |             |                      |
| <b>2A</b> | benzene       | 304(2.2), 446(2.7)                  | 587               |        |           |                      |                   |             |                      |
|           | THF           | 303(2.2), 444(2.7)                  |                   |        |           |                      |                   |             |                      |
|           | ethyl acetate | 301(2.4), 439(3.0)                  |                   |        |           |                      |                   |             |                      |
|           | ethanol       | 300(2.3), 440(2.6)                  |                   |        |           |                      |                   |             |                      |
|           | DMF           | 303(2.6), 374(3.6)                  |                   |        |           |                      |                   |             |                      |
| <b>3A</b> | benzene       | 463(3.0)                            |                   |        |           |                      |                   |             |                      |
|           | THF           | 459(3.2)                            |                   |        |           |                      |                   |             |                      |
|           | ethyl acetate | 454(3.6)                            | 518               |        |           |                      |                   |             |                      |
|           | ethanol       | 460(3.4)                            | 527               |        |           |                      |                   |             |                      |
|           | DMF           | 461(3.2)                            | 528               |        |           |                      |                   |             |                      |

a: Absorption peak position in nm, b: Maximum molar absorbance in  $10^4 \text{ mol}^{-1} \text{ L cm}^{-1}$ , c: Peak position of OPEF spectra in nm.  $\Phi$ : Fluorescence quantum yield,  $\tau$ : Fluorescence lifetime,  $\Delta\nu$ : Stokes shift in  $\text{cm}^{-1}$ , e: The TPEF peak position in nm.  $\sigma$ : 2PA cross section in GM,  $\sigma \times \Phi$ : two-photon action cross-section.

[1] Whittall IR, Humphrey MG. Organometallic complexes for nonlinear optics.

3.1 molecular quadratic hyperpolarizabilities of ene-, imine-, and azo-linked

ruthenium  $\pi$ -acetylides: X-ray Crystal structure of Ru((E)-4,4'-C<sub>6</sub>H<sub>4</sub>CH=CC<sub>6</sub>H<sub>4</sub>CH<sub>2</sub>NO<sub>2</sub>)(PPh<sub>3</sub>)<sub>2</sub>(h-C<sub>5</sub>H<sub>5</sub>). Organometallics 1996;15:1935-41.

[2] Wang XM, Zhou YF, Yu WT, Wang Ch, Fang Q, Jiang MH, et al. Two-photon

pumped lasing stilbene-type chromophores containing various terminal donor groups: relationship between lasing efficiency and intramolecular charge transfer. J Mater Chem 2000;10:2698 -703.
